# Supplementary material for: Characterization of flame synthesized Pd–TiO2 nanocomposite catalysts for oxygen removal from CO2-rich streams in oxy combustion exhausts
Source: Royal Society of Chemistry journal article supplement (doi:10.1039/d1cy00133g), 2021-01-01
Supplement: d1cy00133g1.pdf [file d1cy00133g1.pdf]

## Supporting Information

### **Characterization of Flame Synthesized Pd-TiO<sub>2</sub> Nanocomposite Catalysts for Oxygen Removal from CO<sub>2</sub>-rich Streams in Oxy Combustion Exhausts**

Sungyoon Jung, Nathan Reed, Gregory Yablonsky, and Pratim Biswas\*

Aerosol and Air Quality Research Laboratory  
Center for Aerosol Science and Engineering  
Department of Energy, Environmental and Chemical Engineering  
Washington University in St. Louis,  
St. Louis, MO, 63130, USA

Submitted to Catalysis Science & Technology

May, 2021

\*To whom correspondence should be addressed:

Tel: +1-314-935-5548; Fax: +1-314-935-5464

E-mail: [pbiswas@wustl.edu](mailto:pbiswas@wustl.edu)

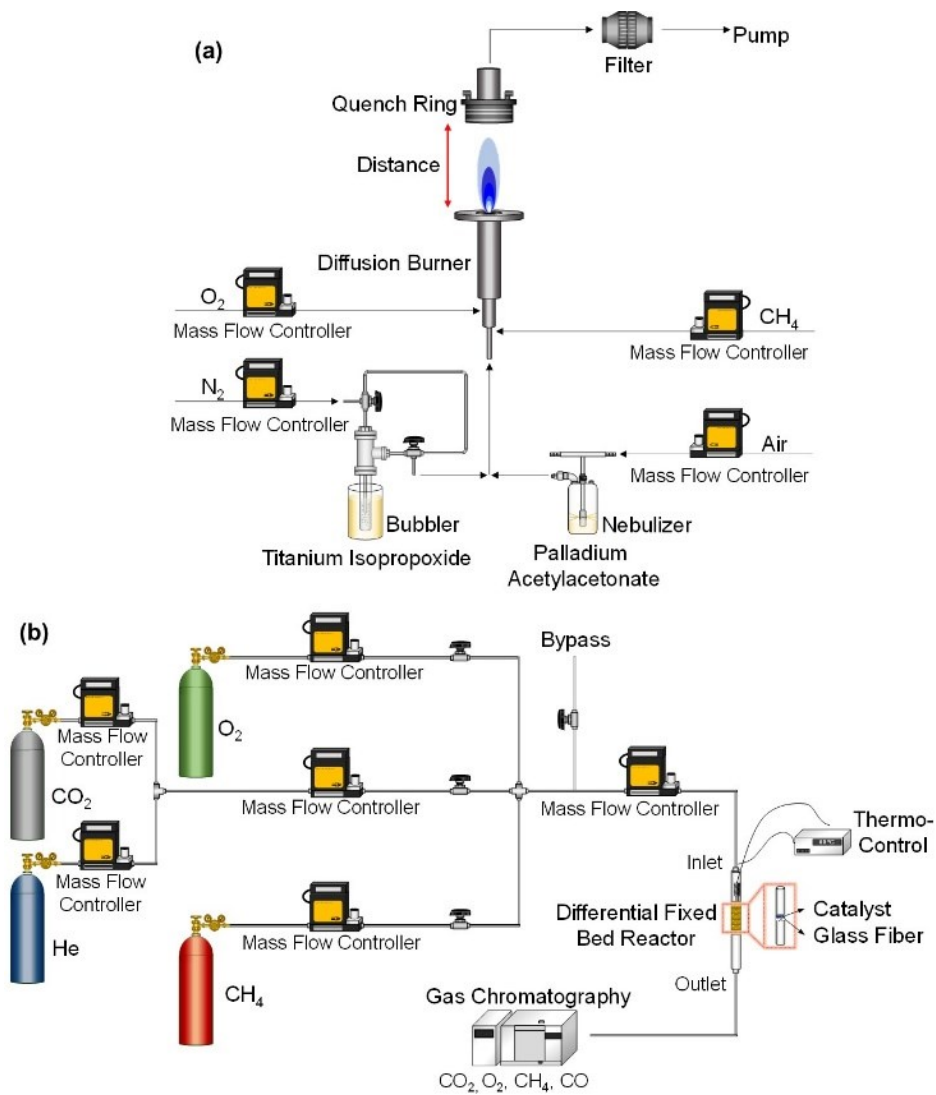

Fig. S1. Schematic diagram of (a) a system for Pd-TiO<sub>2</sub> catalyst synthesis and (b) a differential fixed-bed reactor system for O<sub>2</sub> removal test.

### **Synthesis of Pd-TiO<sub>2</sub> catalysts using a flame aerosol reactor (FLAR)**

The experimental setup for synthesizing Pd-TiO<sub>2</sub> catalysts is shown in Fig. 1a. The flame aerosol reactor (FLAR) system includes a precursor feeding system (bubbler and nebulizer), a diffusion burner, and a quenching and collection system. The bubbler was used for feeding titanium tetraisopropoxide (TTIP, 99.7%, Sigma-Aldrich) with an N<sub>2</sub> carrier gas (1 L min<sup>-1</sup>). The temperature of the oil bath in which the bubbler was placed was maintained at 323 K. The precursor delivery tubes were maintained at around 373 K. The saturated TTIP precursor vapor was introduced into the central port of the burner. Palladium acetylacetonate (Pd(acac)<sub>2</sub>, 97%, Sigma-Aldrich) was used as a dopant precursor, and it was dissolved in xylene (reagent grade, Sigma-Aldrich) and acetonitrile (99.8%, Sigma-Aldrich) mixture (2:1, v/v). In this study, five different Pd-TiO<sub>2</sub> catalysts were synthesized by controlling the concentration of the Pd precursor solutions (0.5 mM ~3.0 mM). A three-jet Collison nebulizer was used to generate spray droplets, which were introduced to the central port of the burner. CH<sub>4</sub> and O<sub>2</sub> were introduced through the second and the outer port of the burner, respectively, with flow rates of 0.35 L min<sup>-1</sup> and 2.5 L min<sup>-1</sup>. The distance between the quench ring and the top of the burner was fixed at 3.8 cm. The synthesized catalysts were collected using an isopore membrane filter.

Table S1 Total Pd loadings of fresh and spent catalysts as determined from FESEM-EDS analyses.

|            | Total Pd loading of fresh catalysts (wt%) | Total Pd loading of spent catalysts (wt%) |
|------------|-------------------------------------------|-------------------------------------------|
| catalyst 1 | 0.21 ± 0.027                              | 0.22 ± 0.038                              |
| catalyst 2 | 0.44 ± 0.041                              | 0.42 ± 0.050                              |
| catalyst 3 | 0.75 ± 0.086                              | 0.69 ± 0.098                              |
| catalyst 4 | 1.00 ± 0.072                              | 0.99 ± 0.084                              |
| catalyst 5 | 1.25 ± 0.058                              | 1.14 ± 0.153                              |

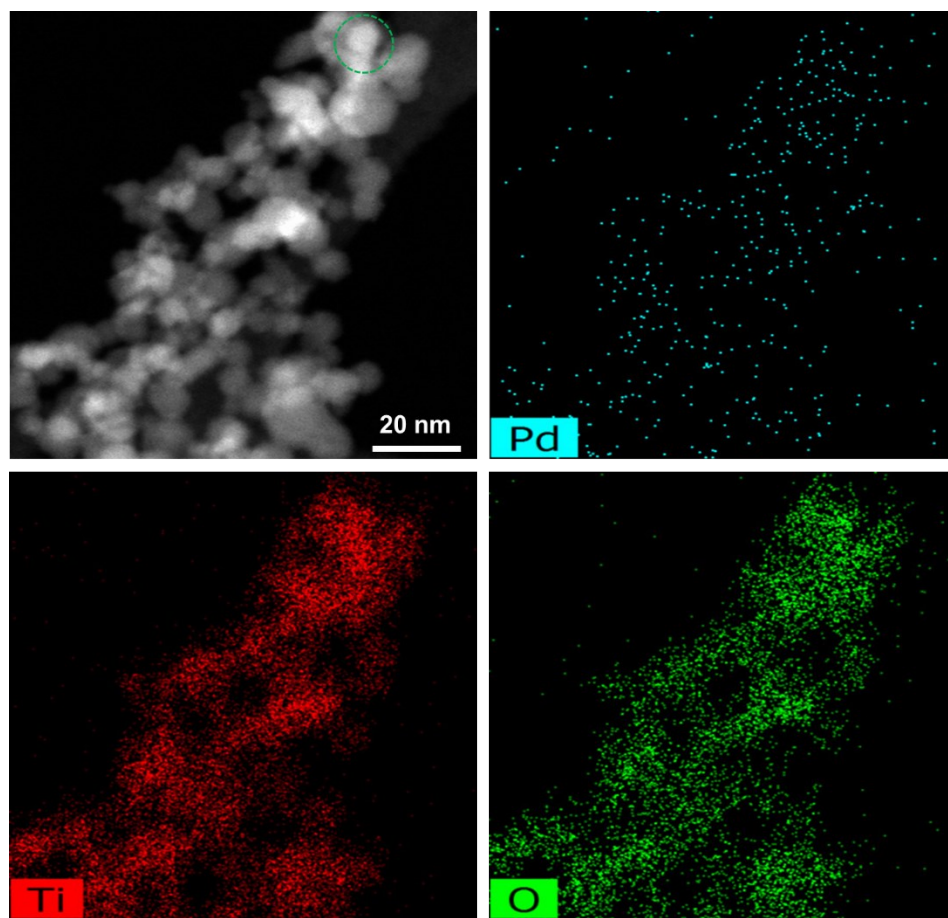

Fig. S2 EDS mapping of the fresh catalyst 4.

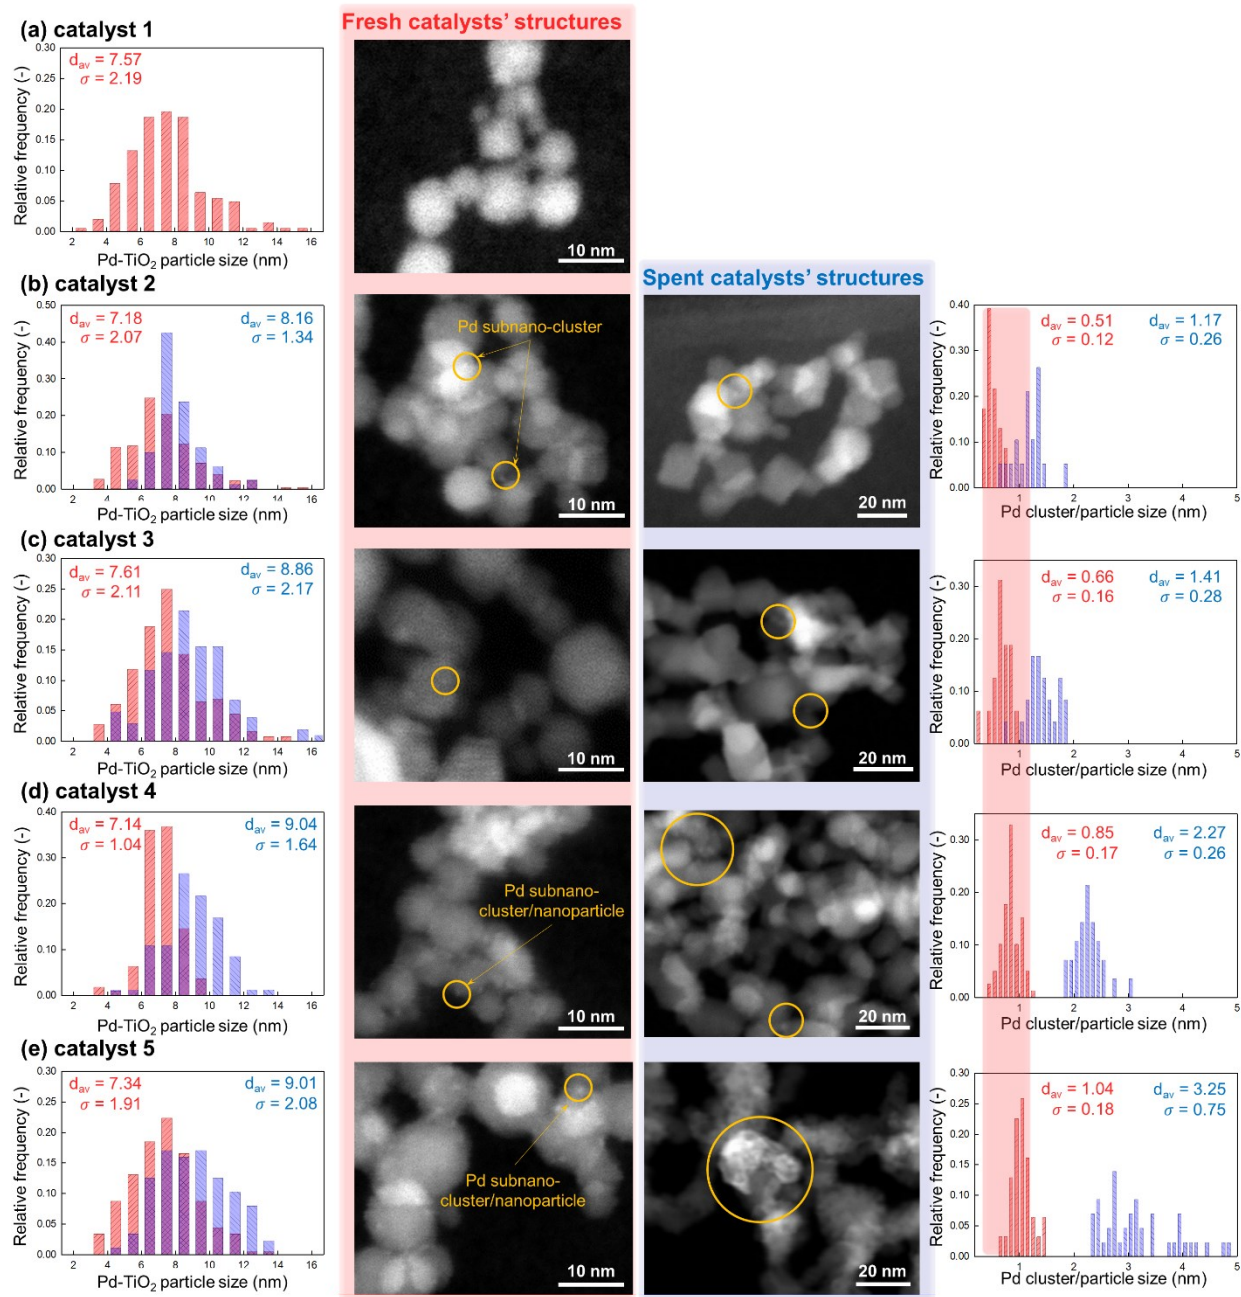

Fig. S3 Bulk Pd-TiO<sub>2</sub> nano particle and Pd subnano cluster/nano particle size distributions, and STEM images of a) catalyst 1, b) catalyst 2, c) catalyst 3, d) catalyst 4, and e) catalyst 5. Results related to the fresh catalysts are denoted with red-color and results related to the treated catalysts are shown with blue-color

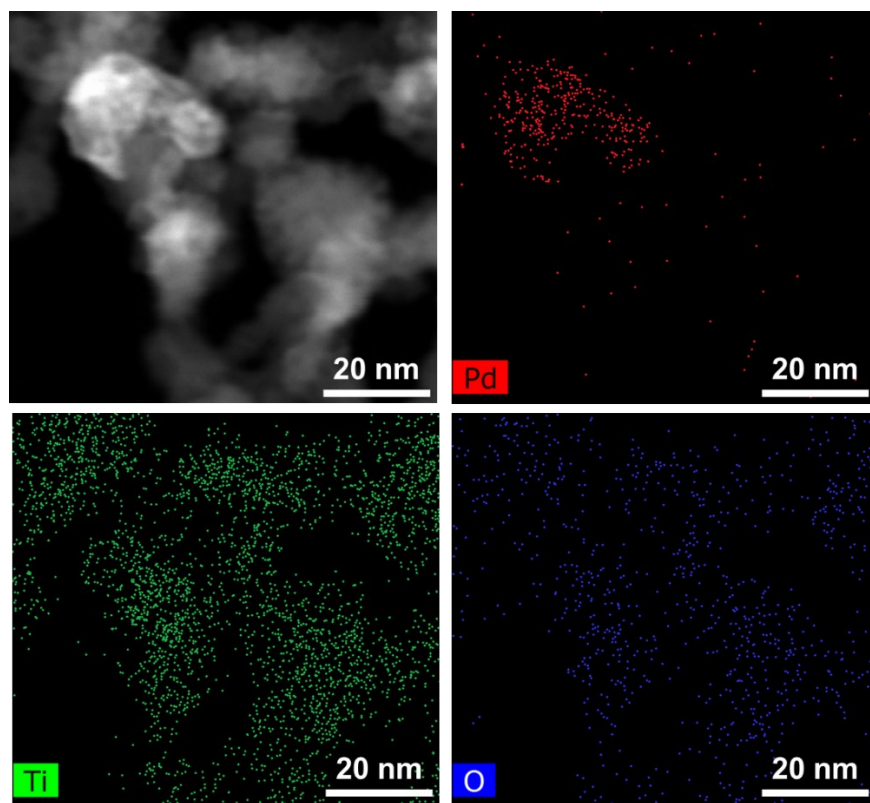

Fig. S4 EDS mapping of the spent catalyst 5.

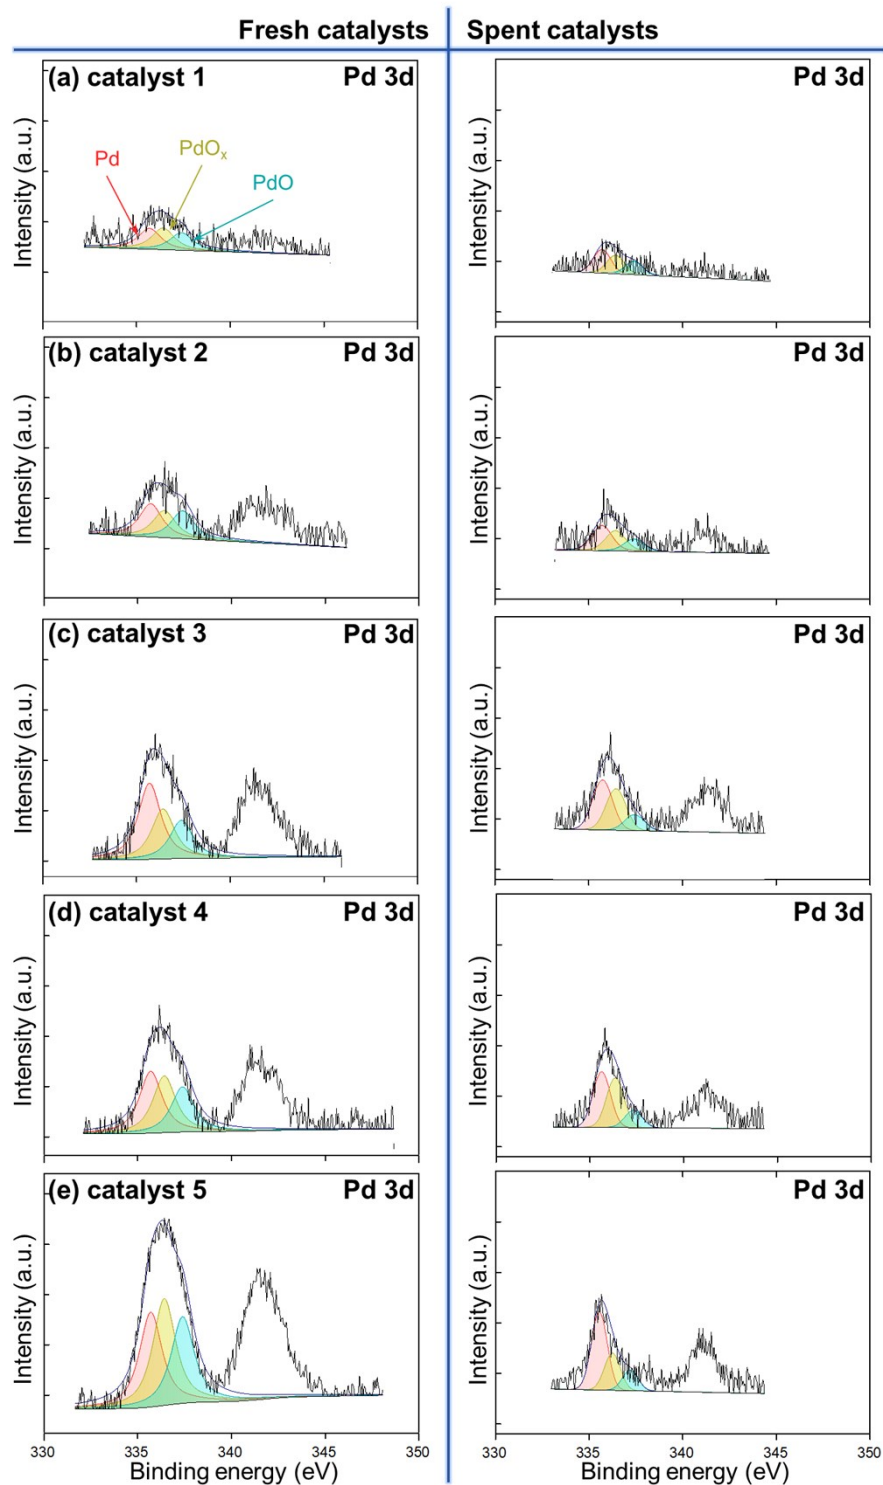

Fig. S5 XPS spectra of fresh and treated Pd-TiO<sub>2</sub> catalysts: Pd metal (red, 335.7 eV), PdO<sub>x</sub> (gold, 336.42 eV), PdO (green, 337.4 eV).



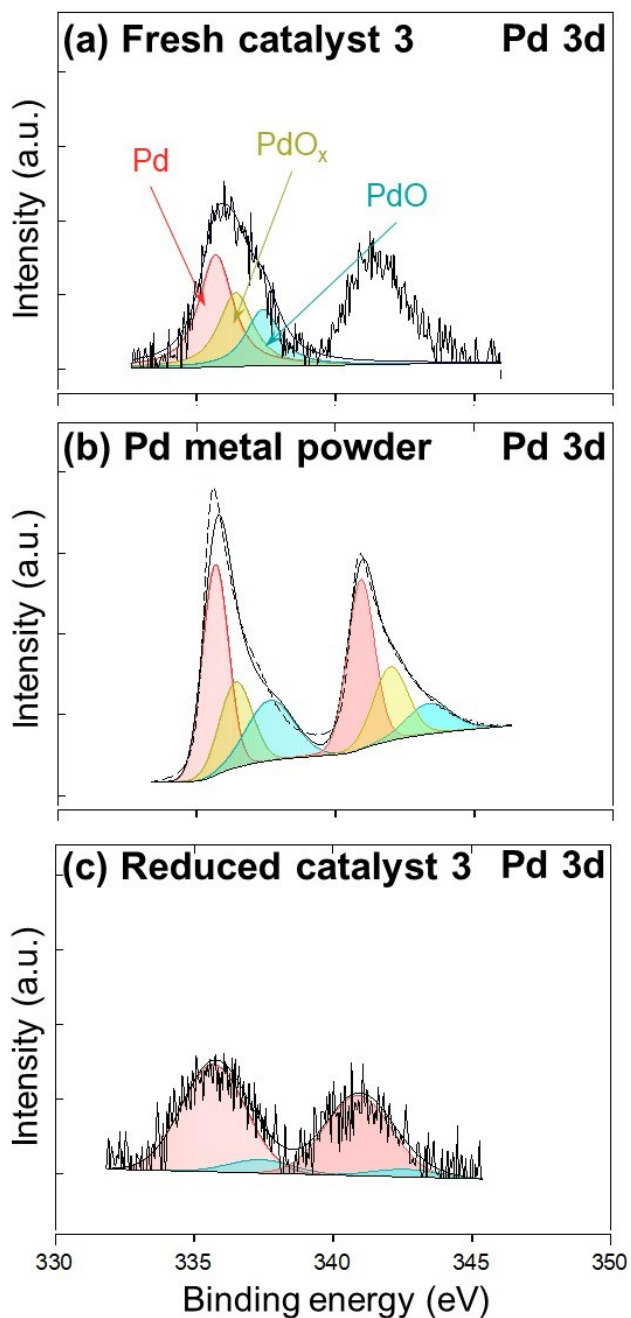

Fig. S6 XPS spectra of (a) fresh catalyst 3, (b) Pd metal powder, and (c) reduced catalyst 3: Pd metal (red, 335.7 eV), PdO<sub>x</sub> (gold, 336.42 eV), PdO (green, 337.4 eV).

To validate the Pd species in the XPS data, the Pd species in Pd metal powder and the reduced catalyst 3 were additionally characterized. Pd metal powder was purchased from Sigma Aldrich

(Palladium, 326666). The reduced catalyst 3 was prepared by reducing the fresh catalyst 3 with hydrogen gas at 500 °C for 2 hrs. For a better comparison, original XPS data of fresh catalyst 3 is shown together with the obtained results (Figure S3a). As can be seen in Figure S3b, the purchased Pd metal powder contained three Pd species which are metallic Pd ( $3d_{5/2}=335.7$  eV and  $3d_{3/2}=340.9$  eV), intermediate Pd ( $3d_{5/2}=336.42$  eV and  $3d_{3/2}=341.6$  eV), and PdO ( $3d_{5/2}=337.4$  eV and  $3d_{3/2}=342.6$  eV). These deconvoluted Pd species in the Pd metal powder are consistent with those in the fresh catalyst 3 (Figure S3a). The existence of the oxidized Pd species (intermediate Pd and PdO) could be created during the sample preparation for the XPS analysis. The reduced catalyst 3 (Figure S3c) contained mostly metallic Pd and a small amount of PdO with binding energies at  $3d_{5/2}=335.7$  eV and  $337.4$  eV and  $3d_{3/2}=340.9$  eV and  $342.6$  eV, respectively. This result could indicate that the deconvoluted Pd species in the reduced catalyst 3 were consistent with those in the fresh catalyst 3 (Figure S3a) and catalyst 3 was successfully reduced. Therefore, these obtained XPS data could validate the Pd species in the prepared samples in the main paper.

Table S2 Fractions of metallic Pd, intermediate PdO<sub>x</sub>, and PdO in the spent catalysts as determined from XPS analysis, and total surface area of metallic Pd ( $TSA_{metallic Pd}$ ), intermediate PdO<sub>x</sub> ( $TSA_{PdO_x}$ ), and PdO ( $TSA_{PdO}$ ).

|            | Metallic Pd (%) | PdO (%)      | PdO <sub>x</sub> (%) | $TSA_{metallic Pd}$ (cm <sup>2</sup> ) | $TSA_{PdO}$ (cm <sup>2</sup> ) | $TSA_{PdO_x}$ (cm <sup>2</sup> ) | $\frac{T_{spent}(\frac{I(Pd)}{I(Ti)})}{T_{fresh}(\frac{I(Pd)}{I(Ti)})}$ |
|------------|-----------------|--------------|----------------------|----------------------------------------|--------------------------------|----------------------------------|-------------------------------------------------------------------------|
| catalyst 1 | 42.60 ± 1.12    | 24.07 ± 0.55 | 33.33 ± 0.65         | -                                      | -                              | -                                | 0.920                                                                   |
| catalyst 2 | 43.89 ± 0.16    | 21.27 ± 0.63 | 34.84 ± 0.47         | 85.68                                  | 68.49                          | 86.16                            | 0.422                                                                   |
| catalyst 3 | 45.91 ± 0.75    | 15.80 ± 0.55 | 38.29 ± 0.86         | 124.70                                 | 70.78                          | 131.74                           | 0.417                                                                   |
| catalyst 4 | 44.06 ± 0.65    | 16.38 ± 1.08 | 39.56 ± 0.95         | 105.61                                 | 64.75                          | 120.12                           | 0.352                                                                   |
| catalyst 5 | 55.61 ± 1.44    | 14.77 ± 0.65 | 29.62 ± 1.37         | -                                      | -                              | -                                | 0.206                                                                   |

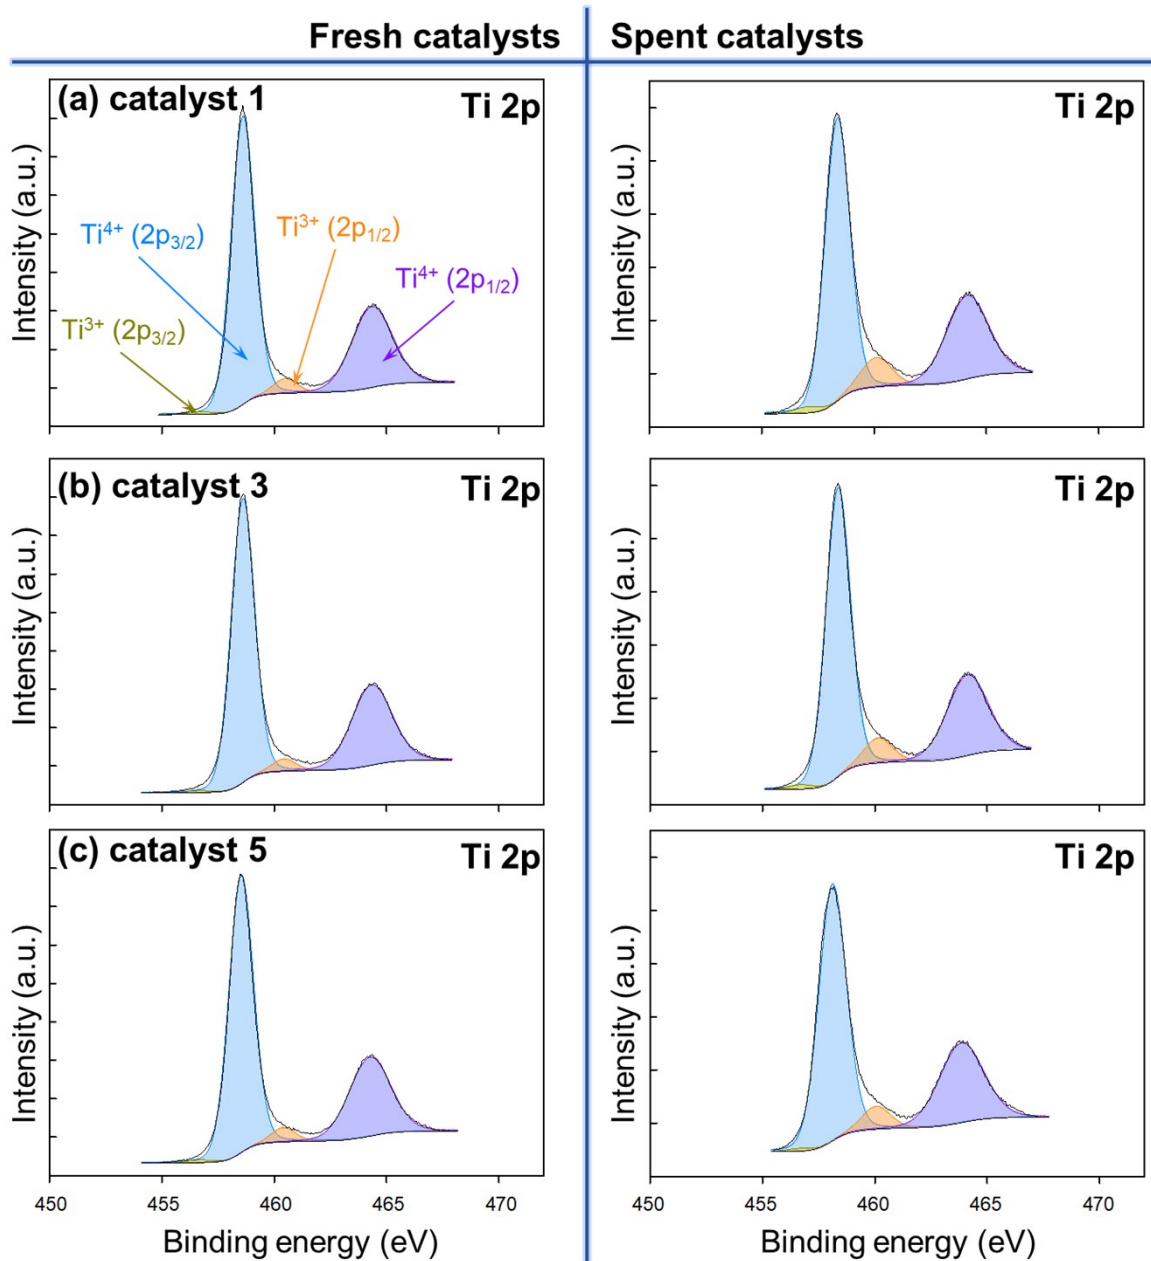

Fig. S7 XPS spectra of fresh and spent Pd-TiO<sub>2</sub> catalysts: Ti<sup>3+</sup> (2p<sub>3/2</sub>) (dark green, 456.7 eV), Ti<sup>4+</sup> (2p<sub>3/2</sub>) (blue, 458.5 eV), Ti<sup>3+</sup> (2p<sub>1/2</sub>) (orange, 460.3 eV), Ti<sup>4+</sup> (2p<sub>1/2</sub>) (purple, 464.2 eV).

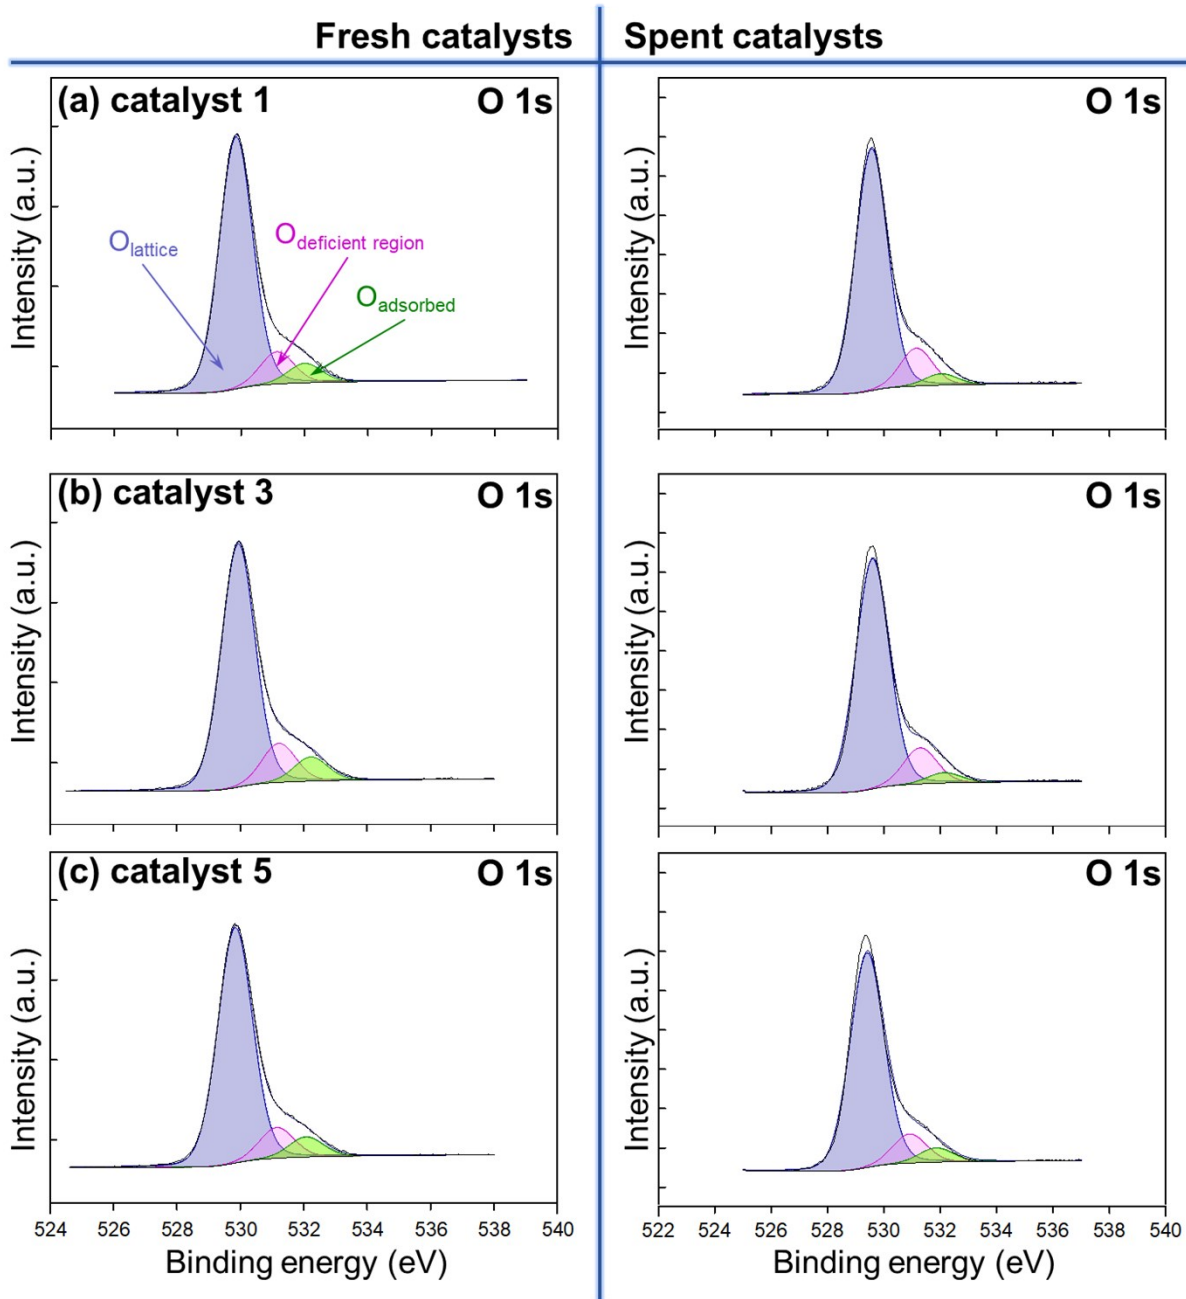

Fig. S8 XPS spectra of fresh and spent Pd-TiO<sub>2</sub> catalysts: O<sub>lattice</sub> (purple, 529.9 eV),

O<sub>deficient region</sub> (pink, 531.3 eV), O<sub>adsorbed</sub> (green, 532.2 eV).

Table S3 Fractions of  $\text{Ti}^{3+}$  ( $2p_{3/2}$ ),  $\text{Ti}^{4+}$  ( $2p_{3/2}$ ),  $\text{Ti}^{3+}$  ( $2p_{1/2}$ ), and  $\text{Ti}^{4+}$  ( $2p_{1/2}$ ) in fresh and spent catalysts.

|            | Fresh catalysts                     |                                     |                                     |                                     | Spent catalysts                     |                                     |                                     |                                     |
|------------|-------------------------------------|-------------------------------------|-------------------------------------|-------------------------------------|-------------------------------------|-------------------------------------|-------------------------------------|-------------------------------------|
|            | $\text{Ti}^{3+}$ ( $2p_{3/2}$ ) (%) | $\text{Ti}^{4+}$ ( $2p_{3/2}$ ) (%) | $\text{Ti}^{3+}$ ( $2p_{1/2}$ ) (%) | $\text{Ti}^{4+}$ ( $2p_{1/2}$ ) (%) | $\text{Ti}^{3+}$ ( $2p_{3/2}$ ) (%) | $\text{Ti}^{4+}$ ( $2p_{3/2}$ ) (%) | $\text{Ti}^{3+}$ ( $2p_{1/2}$ ) (%) | $\text{Ti}^{4+}$ ( $2p_{1/2}$ ) (%) |
| catalyst 1 | 0.64±0.1                            | 65.40 ± 0.30                        | 2.97 ± 0.30                         | 31.40 ± 0.30                        | 1.39                                | 64.35 ± 1.81                        | 6.24 ± 0.83                         | 30.06 ± 0.44                        |
| catalyst 3 | 0.65±0.14                           | 65.42 ± 0.20                        | 2.82 ± 0.23                         | 31.43 ± 0.52                        | 1.01                                | 64.86 ± 0.75                        | 5.23 ± 0.56                         | 29.66 ± 0.30                        |
| catalyst 5 | 0.43±0.24                           | 65.84 ± 0.45                        | 2.82 ± 0.30                         | 31.13 ± 0.40                        | 0.66                                | 64.34 ± 1.08                        | 4.97 ± 0.46                         | 30.49 ± 0.42                        |

Table S4 Fractions of  $O_{\text{lattice}}$ ,  $O_{\text{deficient region}}$ , and  $O_{\text{adsorbed}}$  in fresh and spent catalysts.

|            | Fresh catalysts          |                                   |                           | Spent catalysts          |                                   |                           |
|------------|--------------------------|-----------------------------------|---------------------------|--------------------------|-----------------------------------|---------------------------|
|            | $O_{\text{lattice}}$ (%) | $O_{\text{deficient region}}$ (%) | $O_{\text{adsorbed}}$ (%) | $O_{\text{lattice}}$ (%) | $O_{\text{deficient region}}$ (%) | $O_{\text{adsorbed}}$ (%) |
| catalyst 1 | $82.56 \pm 0.52$         | $10.48 \pm 0.09$                  | $6.97 \pm 0.06$           | $81.85 \pm 1.43$         | $13.48 \pm 0.34$                  | $4.67 \pm 1.23$           |
| catalyst 3 | $80.92 \pm 1.50$         | $12.10 \pm 0.65$                  | $6.98 \pm 0.85$           | $83.56 \pm 0.48$         | $13.46 \pm 0.35$                  | $3.79 \pm 0.59$           |
| catalyst 5 | $82.96 \pm 0.80$         | $10.79 \pm 0.02$                  | $6.26 \pm 0.81$           | $82.98 \pm 0.20$         | $12.33 \pm 1.40$                  | $4.70 \pm 1.19$           |

Table S5 O<sub>2</sub> and CH<sub>4</sub> conversion, and apparent reaction rate constant ( $k_{app}$ ) with TiO<sub>2</sub>, catalyst 1, catalyst 2, catalyst 3, catalyst 4 and catalyst 5 at 723 K.

|                  | O <sub>2</sub> conversion (%) | CH <sub>4</sub> conversion (%) | $k_{app}$ (min <sup>-1</sup> ) |
|------------------|-------------------------------|--------------------------------|--------------------------------|
| TiO <sub>2</sub> | 30.9                          | 50.7                           | 7.71                           |
| catalyst 1       | 55.8                          | 64.4                           | 17.01                          |
| catalyst 2       | 67.0                          | 81.9                           | 23.10                          |
| catalyst 3       | 77.0                          | 92.4                           | 30.62                          |
| catalyst 4       | 75.3                          | 93.8                           | 29.13                          |
| catalyst 5       | 70.1                          | 93.0                           | 25.15                          |



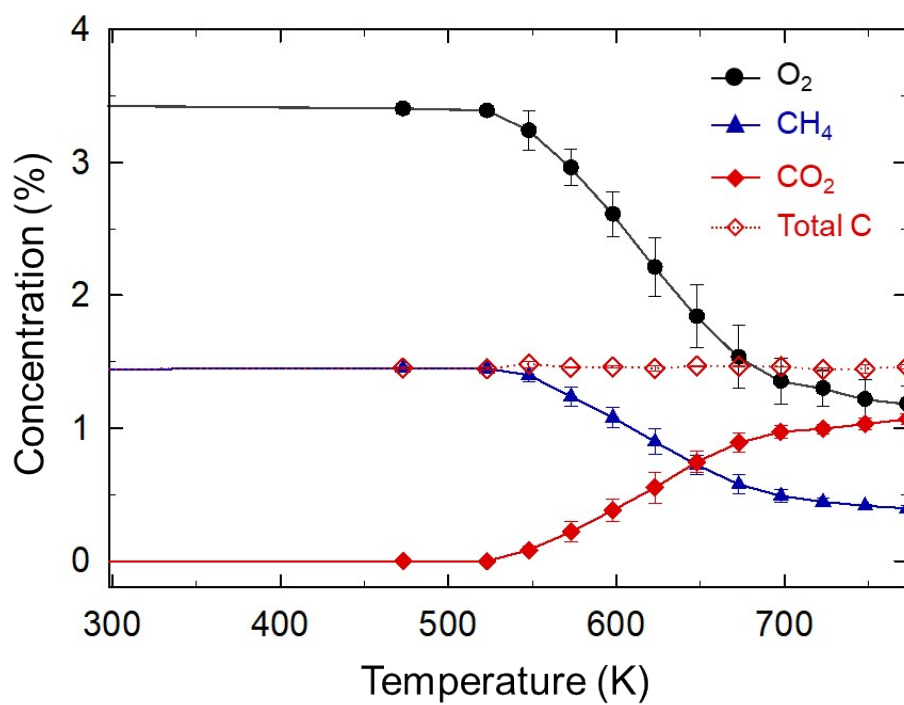

Fig. S9 The change in the concentration of O<sub>2</sub>, CH<sub>4</sub>, CO<sub>2</sub> and Total C with catalyst 3 (Helium was used instead of CO<sub>2</sub>).

Table S6 Reaction rates of CH<sub>4</sub> and 1/2O<sub>2</sub> with different catalysts.

|            | $R_{CH_4}$<br>(mmol/g <sub>cat</sub> /hr) |        | $1/2R_{O_2}$<br>(mmol/g <sub>cat</sub> /hr) |        | $\left  \frac{R_{CH_4} - 1/2R_{O_2}}{R_{CH_4}} \right  \times 100$<br>(%) <sup>a</sup> |       |
|------------|-------------------------------------------|--------|---------------------------------------------|--------|----------------------------------------------------------------------------------------|-------|
|            | 723 K                                     | 773 K  | 723 K                                       | 773 K  | 723 K                                                                                  | 773 K |
| catalyst 1 | -7.16                                     | -8.82  | -7.50                                       | -9.36  | 1.10                                                                                   | 2.45  |
| catalyst 2 | -9.06                                     | -9.87  | -9.39                                       | -10.01 | 0.47                                                                                   | 2.61  |
| catalyst 3 | -10.63                                    | -10.93 | -10.35                                      | -10.66 | 2.73                                                                                   | 2.61  |
| catalyst 4 | -10.73                                    | -11.18 | -10.27                                      | -10.71 | 5.00                                                                                   | 4.84  |
| catalyst 5 | -10.41                                    | -10.81 | -9.69                                       | -10.20 | 6.06                                                                                   | 5.20  |

<sup>a</sup> Via complete CH<sub>4</sub> oxidation reaction ( $CH_4 + 2O_2 \rightarrow CO_2 + 2H_2O$ ):

$$\frac{R_{CH_4}}{-1} = \frac{R_{O_2}}{-2}$$

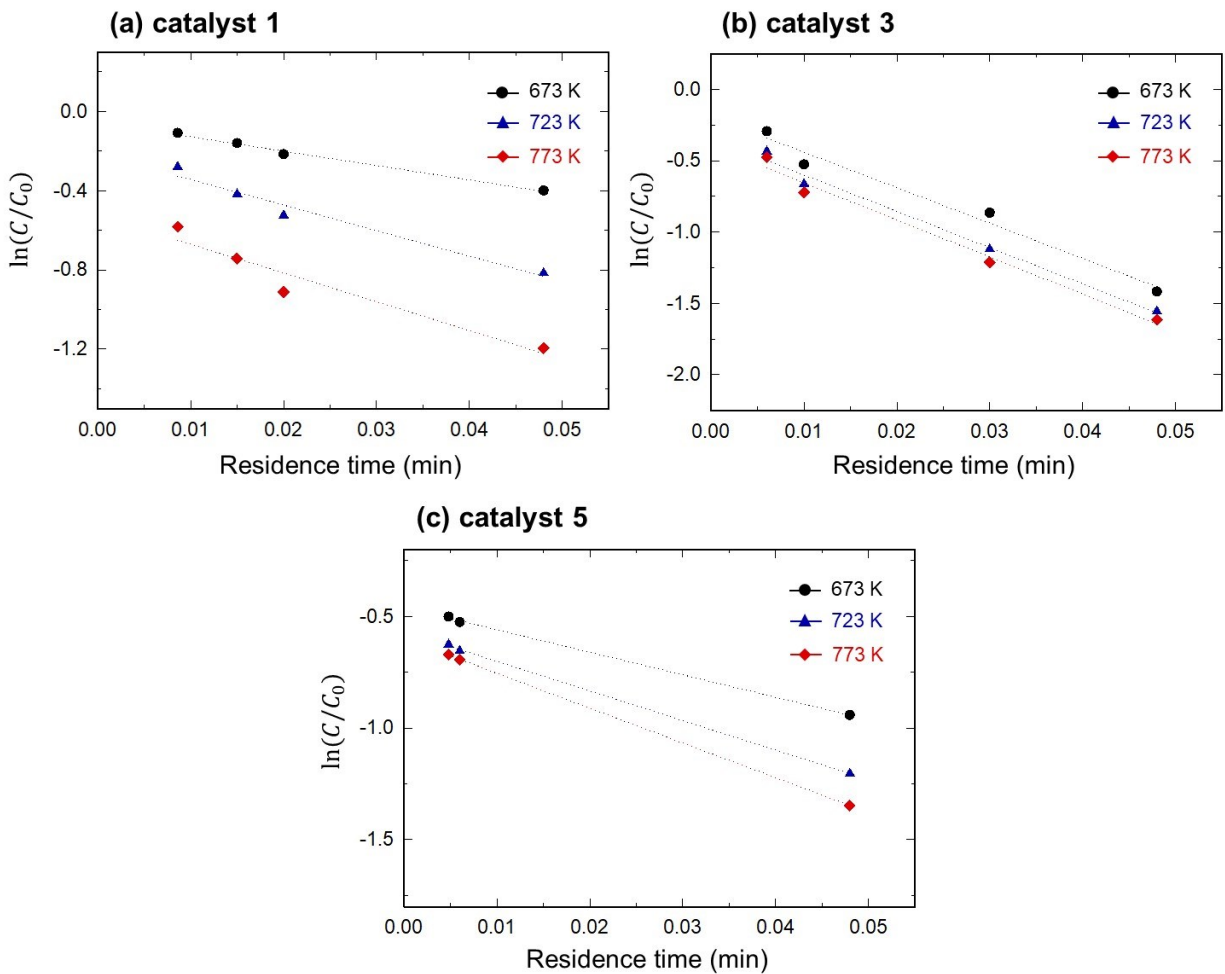

Fig. S10 The natural log of  $C/C_0$  versus residence time (a) with catalyst 1, (b) with catalyst 3, and (c) with catalyst 5 at different temperatures.

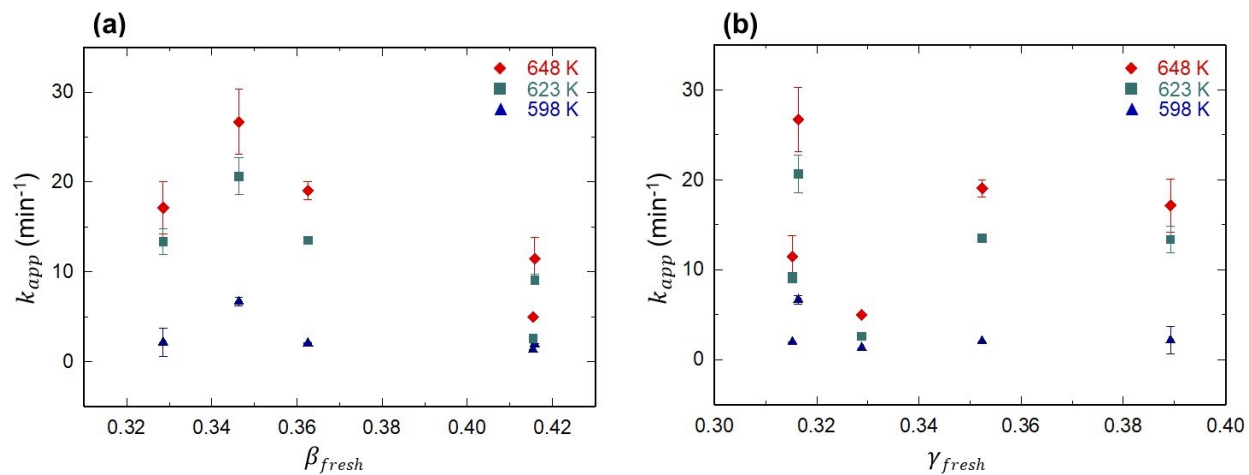

Fig. S11 Variation of the apparent reaction rate constant ( $k_{app}$ ) with (a) the fraction of the total surface area of PdO ( $\beta_{fresh}$ ) and (b) the fraction of the total surface area of PdO<sub>x</sub> ( $\gamma_{fresh}$ ) in the fresh catalysts at different temperatures.

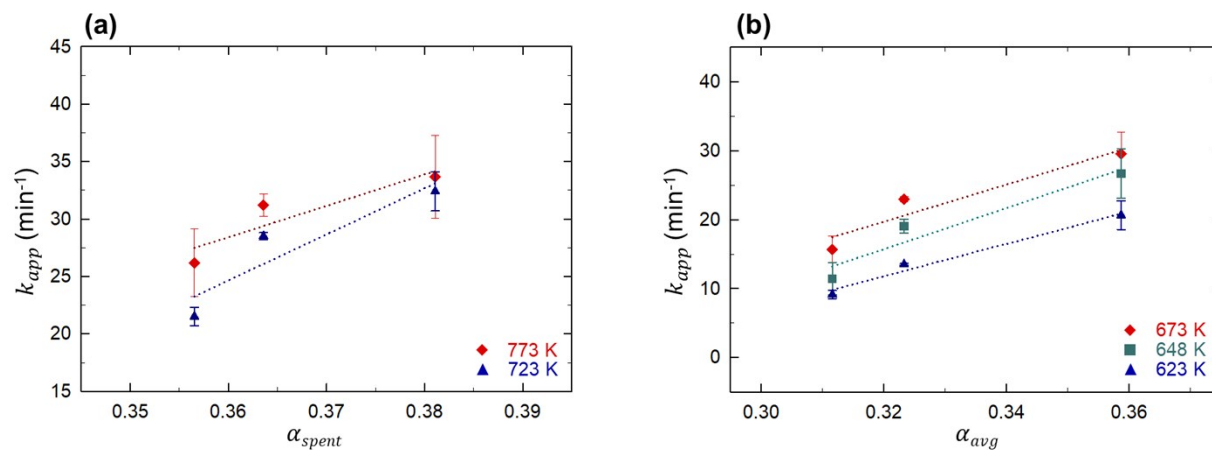

Fig. S12 Variation of the apparent reaction rate constant ( $k_{app}$ ) with (a) the fraction of the total surface area of metallic Pd in the treated catalysts ( $\alpha_{spent}$ ), and (b) the average fraction of the total surface area of metallic Pd ( $\alpha_{avg}$ ) at different temperatures.

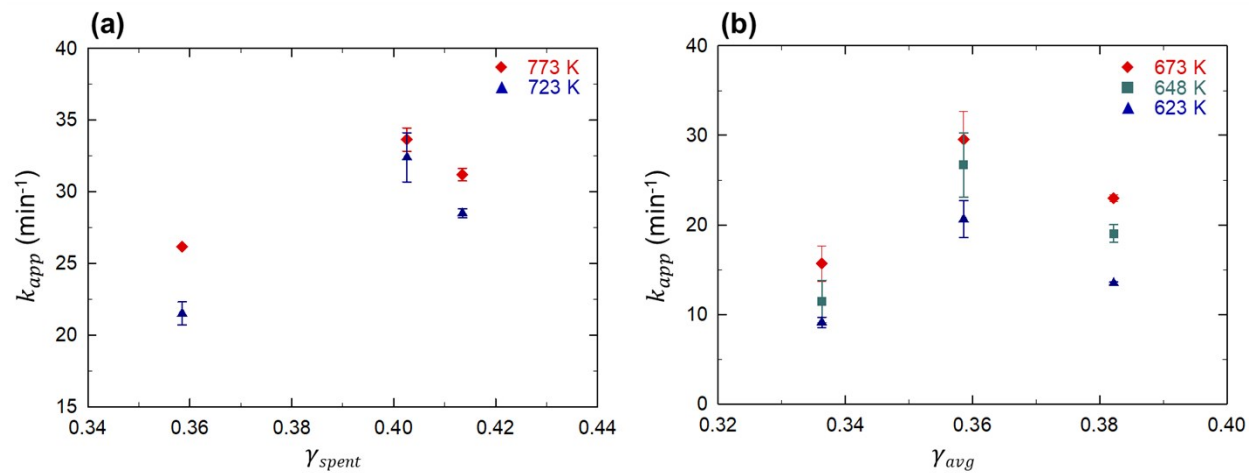

Fig. S13 Variation of the apparent reaction rate constant ( $k_{app}$ ) with (a) the fraction of the total surface area of  $\text{PdO}_x$  in the treated catalysts ( $\gamma_{spent}$ ) and (b) the average fraction of the total surface area of  $\text{PdO}_x$  ( $\gamma_{avg}$ ) at different temperatures.

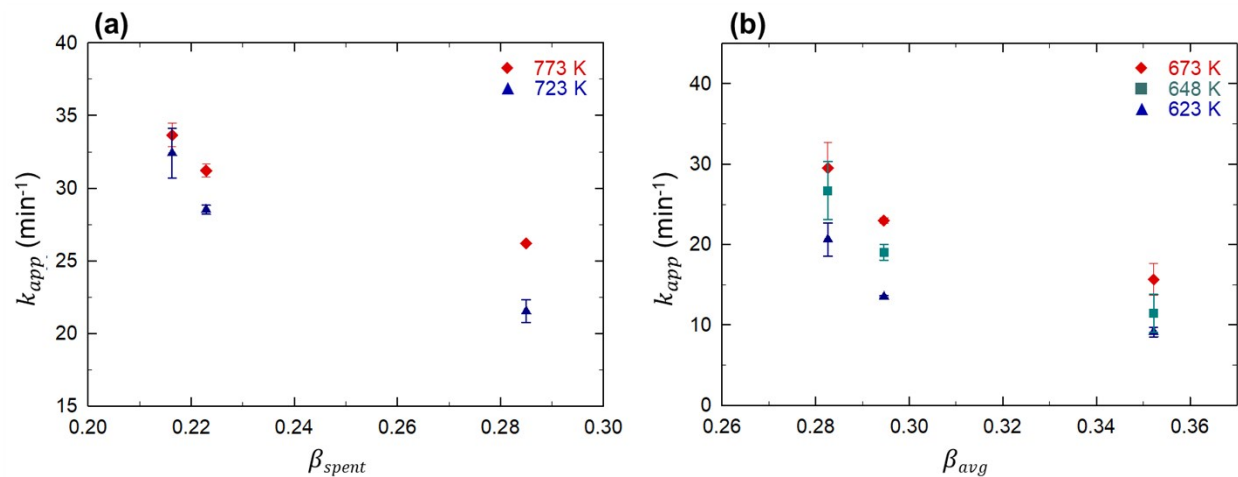

Fig. S14 Variation of the apparent reaction rate constant ( $k_{app}$ ) with (a) the fraction of the total surface area of PdO in the treated catalysts ( $\beta_{spent}$ ) and (b) the average fraction of the total surface area of PdO ( $\beta_{avg}$ ) at different temperatures.

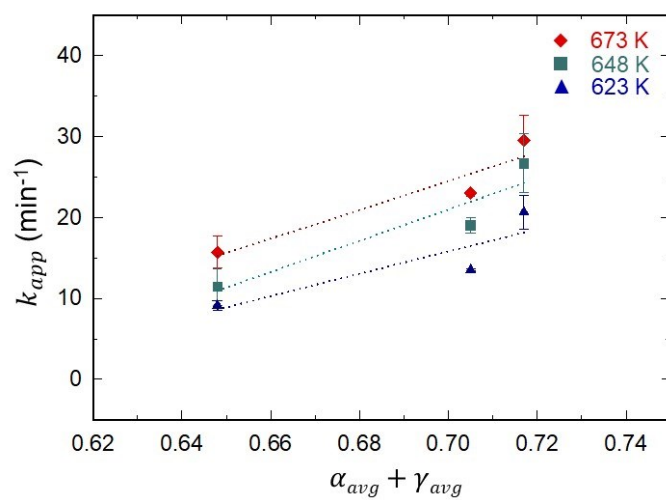

Fig. S15 Variation of the apparent reaction rate constant ( $k_{app}$ ) with the sum of average fractions of the total surface area of metallic Pd and PdO<sub>x</sub> ( $\alpha_{avg} + \gamma_{avg}$ ) at different temperatures.



Table S7 Reaction rates of CH<sub>4</sub> and 1/2O<sub>2</sub> with catalyst 3 under different CO<sub>2</sub> concentrations.

|                     | $R_{CH_4}$<br>(mmol/g <sub>cat</sub> /hr) |        | $1/2R_{O_2}$<br>(mmol/g <sub>cat</sub> /hr) |        | $\left  \frac{R_{CH_4} - 1/2R_{O_2}}{R_{CH_4}} \right  \times 100$<br>(%) |       |
|---------------------|-------------------------------------------|--------|---------------------------------------------|--------|---------------------------------------------------------------------------|-------|
|                     | 723 K                                     | 773 K  | 723 K                                       | 773 K  | 723 K                                                                     | 773 K |
| 0% CO <sub>2</sub>  | -7.97                                     | -8.36  | -7.87                                       | -8.35  | 1.32                                                                      | 0.09  |
| 53% CO <sub>2</sub> | -9.21                                     | -10.01 | -9.35                                       | -9.71  | 2.51                                                                      | 0.49  |
| 95% CO <sub>2</sub> | -10.64                                    | -10.95 | -10.35                                      | -10.66 | 2.73                                                                      | 2.61  |

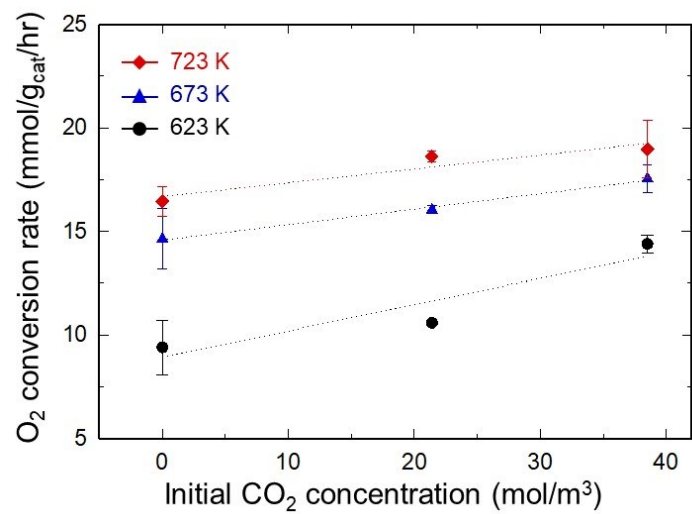

Fig. S16 Variation of O<sub>2</sub> conversion with CO<sub>2</sub> concentration at different temperatures.

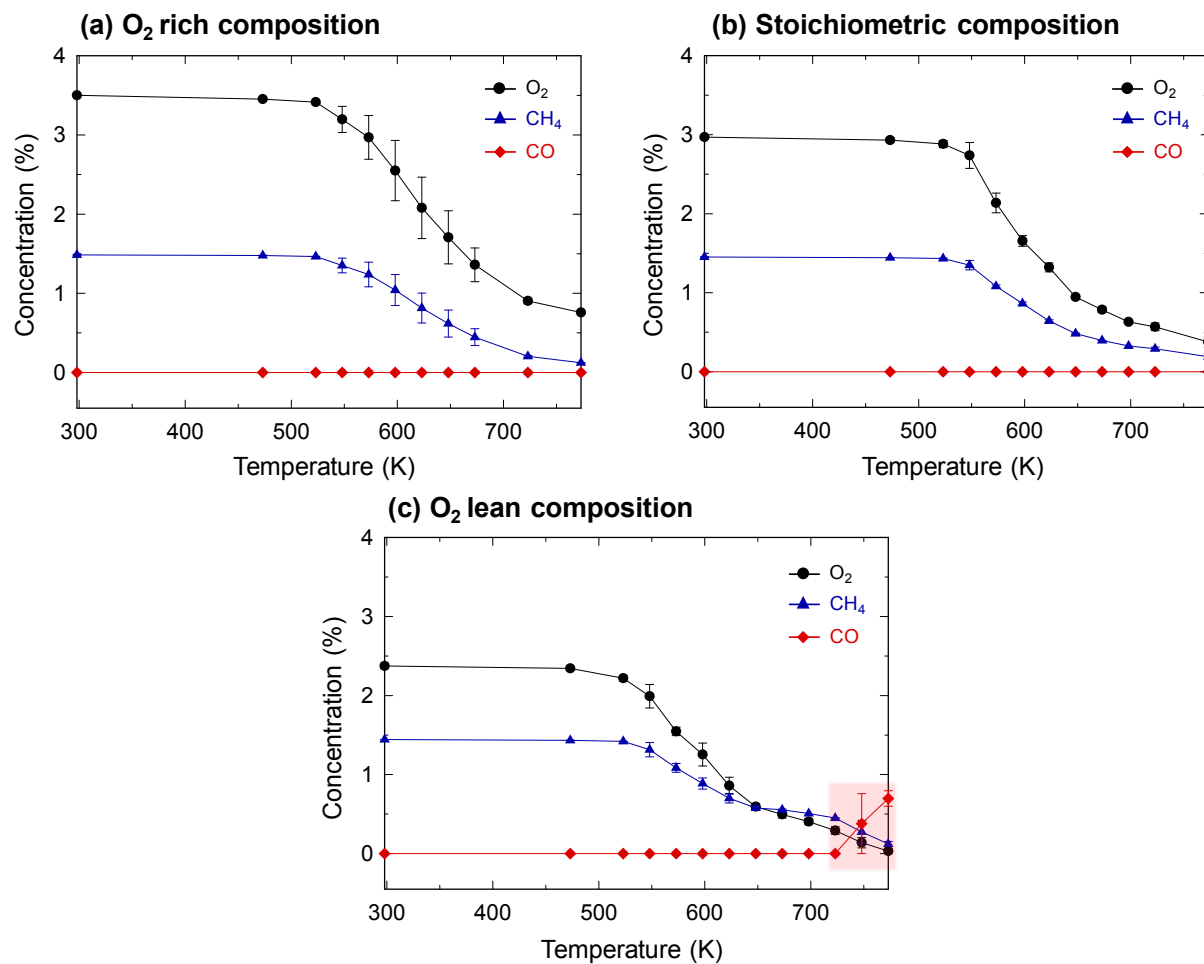

Fig. S17 (a)-(c) change in the concentration of O<sub>2</sub>, CH<sub>4</sub>, and CO with catalyst 3 under different initial compositions (O<sub>2</sub> rich composition: O<sub>2</sub>/CH<sub>4</sub>  $\cong$  2.4, stoichiometric composition: O<sub>2</sub>/CH<sub>4</sub>  $\cong$  2.0, O<sub>2</sub> lean composition: O<sub>2</sub>/CH<sub>4</sub>  $\cong$  1.6).
